# Supplementary material
Source: PubMed Central journal article supplement (PMC9885685)

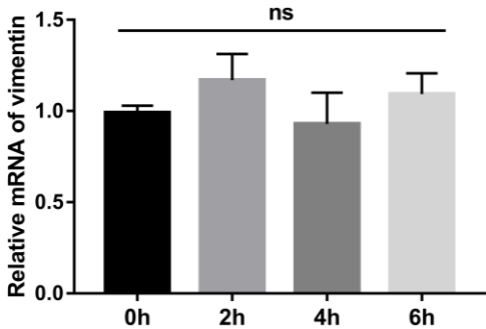

Supplement: 13567_2023_1135_MOESM1_ESM.pdf [file 13567_2023_1135_MOESM1_ESM.pdf]
